# Supplementary material for: Continuous photon energy modulation in IMRT of pancreatic cancer
Source: Frontiers journal article supplement (doi:10.3389/fphy.2023.1205650), 2023-08-15
Supplement: Table_1.XLSX [file Table_1.XLSX]

## Sheet: PTV
	PTV D2%(Gy)			PTV D98%(Gy)			PTV D50%(Gy)			PTV 95%(%)			PTV 105%(%)			PTV Dmean(Gy)			PTV CI			PTV HI
	IMRT-6MV	IMRT-15MV	IMRT-BEM	IMRT-6MV	IMRT-15MV	IMRT-BEM	IMRT-6MV	IMRT-15MV	IMRT-BEM	IMRT-6MV	IMRT-15MV	IMRT-BEM	IMRT-6MV	IMRT-15MV	IMRT-BEM	IMRT-6MV	IMRT-15MV	IMRT-BEM	IMRT-6MV	IMRT-15MV	IMRT-BEM	IMRT-6MV	IMRT-15MV	IMRT-BEM
P01	57.63	57.84	56.42	52.57	52.7	52.99	56.47	56.65	55.55	99.22	99.25	99.51	38.69	46.85	0.3	56.24	56.37	55.39	0.819093	0.833893	0.861277	0.0896051	0.0907326	0.0617462
P02	57.78	57.99	57.15	52.81	52.86	52.99	56.57	56.79	55.98	99.41	99.44	99.53	45.08	52.84	13.27	56.57	56.79	55.79	0.829215	0.821469	0.843259	0.0878558	0.0903328	0.0743123
P03	57.79	58.09	57.06	53.02	53.08	53.08	56.55	57.04	55.95	99.55	99.59	99.67	41.11	65.1	10.88	56.27	56.65	55.78	0.835382	0.82122	0.851799	0.0843501	0.0878331	0.0711349
P04	57.42	57.45	56.71	53.07	53.06	53.15	56.29	56.47	55.68	99.55	99.5	99.62	24.46	34.43	2.14	56.03	56.15	55.54	0.801524	0.809698	0.814637	0.0772784	0.0777404	0.0639368
P05	57.49	57.73	57.08	52.66	52.54	52.67	56.42	56.73	56	99.01	98.85	99.01	33.68	51.59	11.18	56.14	56.37	55.8	0.83967	0.830853	0.839707	0.0856079	0.091486	0.07875
P06	56.87	57.22	56.14	53.27	53.13	53.38	55.64	56	55.17	99.75	99.72	99.81	3.37	11.76	0.01	55.52	55.82	55.08	0.827059	0.821567	0.854428	0.0647017	0.0730357	0.0500272
P07	56.69	57.18	55.85	53.27	53.26	53.46	55.64	55.98	55.05	99.83	99.79	99.89	1.8	12.97	0	55.49	55.79	54.97	0.872814	0.861862	0.886582	0.0614666	0.070025	0.0434151
P08	58.57	58.98	57.33	52.76	52.74	52.91	57	57.23	56.01	99.37	99.34	99.49	63.22	70.59	19.46	56.68	56.88	55.87	0.813607	0.806124	0.828164	0.10193	0.109034	0.0789145
P09	58.18	58.14	56.86	52.63	52.7	52.94	56.51	56.76	55.62	99.23	99.31	99.44	42.42	52.81	4.87	56.37	56.53	55.5	0.740965	0.775433	0.785489	0.0982127	0.0958421	0.0704782
P10	57.26	57.39	56.66	52.85	52.76	53.03	56.31	56.51	55.47	99.68	99.57	99.79	27.21	37.8	1.66	56.07	56.2	55.37	0.802617	0.810721	0.838651	0.0783165	0.0819324	0.0654408

## Sheet: OAR
	Normal Tissue							Liver									Left Kidney									Right Kidney									Spinal Cord						Duodenum
	Volume(l)	Dmean(Gy)			Intergral nontarget dose			Dmean(Gy)			V15(%)			V30 (%)			Dmean(Gy)			V15(%)			V30(%)			Dmean(Gy)			V15(%)			V30(%)			Dmean(Gy)			Dmax(Gy)			Dmean(Gy)			Dmax(Gy)			V20(%)
		IMRT-6MV	IMRT-15MV	IMRT-BEM	IMRT-6MV	IMRT-15MV	IMRT-BEM	IMRT-6MV	IMRT-15MV	IMRT-BEM	IMRT-6MV	IMRT-15MV	IMRT-BEM	IMRT-6MV	IMRT-15MV	IMRT-BEM	IMRT-6MV	IMRT-15MV	IMRT-BEM	IMRT-6MV	IMRT-15MV	IMRT-BEM	IMRT-6MV	IMRT-15MV	IMRT-BEM	IMRT-6MV	IMRT-15MV	IMRT-BEM	IMRT-6MV	IMRT-15MV	IMRT-BEM	IMRT-6MV	IMRT-15MV	IMRT-BEM	IMRT-6MV	IMRT-15MV	IMRT-BEM	IMRT-6MV	IMRT-15MV	IMRT-BEM	IMRT-6MV	IMRT-15MV	IMRT-BEM	IMRT-6MV	IMRT-15MV	IMRT-BEM	IMRT-6MV	IMRT-15MV	IMRT-BEM
P01	28.7	2.71	2.54	2.59	77.777	72.898	74.333	1.31	1.05	1.15	0	0	0	0	0	0	5.82	6.36	6.04	3.02	2.58	2.93	0.1	0.02	0.21	8.05	7.86	8.16	7.48	6.68	7.01	0	0	0	14.18	13.23	13.3	36.79	36.27	37.36	19.79	19.72	19.59	51.21	51.32	51.85	38.83	38.55	36.81
P02	25.6	2.9	2.68	2.74	83.23	76.916	78.638	6.3	6.2	6.05	13.17	13.39	13	3.35	3.72	2.44	7.08	6.73	6.75	15.53	15.64	15.39	4.58	3.77	3.67	6.97	6.97	6.81	9.8	9.12	8.95	4.41	2.12	3.07	6.34	5.96	5.92	28.76	27.95	28.34	9.2	8.46	8.4	51.79	51.18	52.41	15.78	12.83	12.85
P03	35.2	1.54	1.43	1.47	44.198	41.041	42.189	11.32	11.14	11.12	26.71	26.58	25.81	10.32	8.88	8.85	8.74	8.95	8.84	13.5	13.7	14.2	0.06	0	0.12	6	5.7	5.93	15.25	14.86	15.62	1.62	1.84	1.26	12.61	12.63	12.57	21.25	21.13	21.04	22.56	22.41	21.61	53.82	53.97	53.89	54.66	53.59	48.03
P04	26.05	1.54	1.45	1.54	44.198	41.615	44.198	0.94	0.83	0.94	0.03	0.01	0.06	0	0	0	3.43	3.36	3.43	3.37	2.75	2.57	0	0	0	3.7	3.57	3.82	4.83	4.24	5.44	0	0	0	10.43	10.23	10.23	21.67	21.88	21.84	11.32	11.52	11.57	53.01	52.59	52.47	13.79	14.17	13.45
P05	13.52	2.23	2.12	2.17	64.001	60.844	62.279	5.67	5.72	5.72	9.09	9.4	9.37	3.23	3.23	3.19	2.43	2.24	2.32	3.34	3.42	3.32	1.33	1.07	1.22	1.74	1.63	1.83	0	0	0	0	0	0	4.15	3.99	3.96	31.3	30.94	30.42	25.36	25.44	24.88	52.97	53.08	53.54	63.81	66.28	63.82
P06	19.98	3.14	2.96	3.03	90.118	84.952	86.961	4.06	3.86	3.96	5.76	5.7	5.74	2.37	1.81	2.04	8.19	8.29	7.98	7.04	7.76	7.22	0	0	0	7.67	7.63	7.79	11.08	11.36	7.89	0	0	0	6.92	6.77	6.76	27.19	27.2	27.69	15.11	14.73	14.48	52.6	53.2	53.22	28.08	27.79	26.44
P07	17.89	2.71	2.55	2.63	77.777	73.185	75.481	2.8	2.64	2.69	3.6	3.7	3.59	1.06	0.99	1.21	7.31	6.99	7.13	10.26	9.94	10.38	0	0	0.07	7.67	7.48	7.55	10.58	10.41	10.48	0.86	0.73	1.35	7.7	7.74	7.66	27.17	27.46	27.48	15.29	14.8	14.46	52.3	52.5	52.14	28.11	25.85	22.9
P08	27.8	1.73	1.63	1.62	49.651	46.781	46.494	0.73	0.62	0.6	0	0	0	0	0	0	6.78	6.55	7.08	2.25	2.08	1.69	0	0	0	8.98	8.85	8.97	17.69	18.39	17.51	1.25	0.78	1.08	9.16	9.27	9.12	33.13	32.67	33.07	19.04	18.7	18.17	53.45	54.23	53.66	38.04	38.95	36.21
P09	36.48	2.26	2.07	2.13	64.862	59.409	61.131	0.76	0.53	0.61	0	0	0	0	0	0	8.1	8.82	8.84	12.32	13.64	13.87	0.44	0.34	0.3	8.96	9.34	9.6	12.71	14.26	14.54	0.12	0.12	0	7.97	8.11	7.86	24.62	27.6	26.74	23.65	23	22.74	52.53	51.16	51.82	60.23	60.08	57.73
P10	28.44	1.57	1.51	1.53	45.059	43.337	43.911	3.16	3.29	3.21	2.66	3.11	2.53	0.1	0.09	0.06	7.75	7.89	7.83	6.39	6.63	7.96	0	0	0	6.98	6.81	6.79	10.15	8.56	8.08	0	0	0	2.34	2.18	2.08	35.22	36.17	36.22	19.66	20.04	19.27	52.77	52.5	52.43	44.78	49.26	42.48
[truncated: 27 more columns]
